# Supplementary material for: Loss of neurofibromin Ras-GAP activity enhances the formation of cardiac blood islands in murine embryos
Source: eLife journal article supplement (doi:10.7554/elife.07780), 2015-10-13

Figure 4-figure supplement 1

**A**

***Nf1*<sup>GRD</sup> Targeting Strategy**

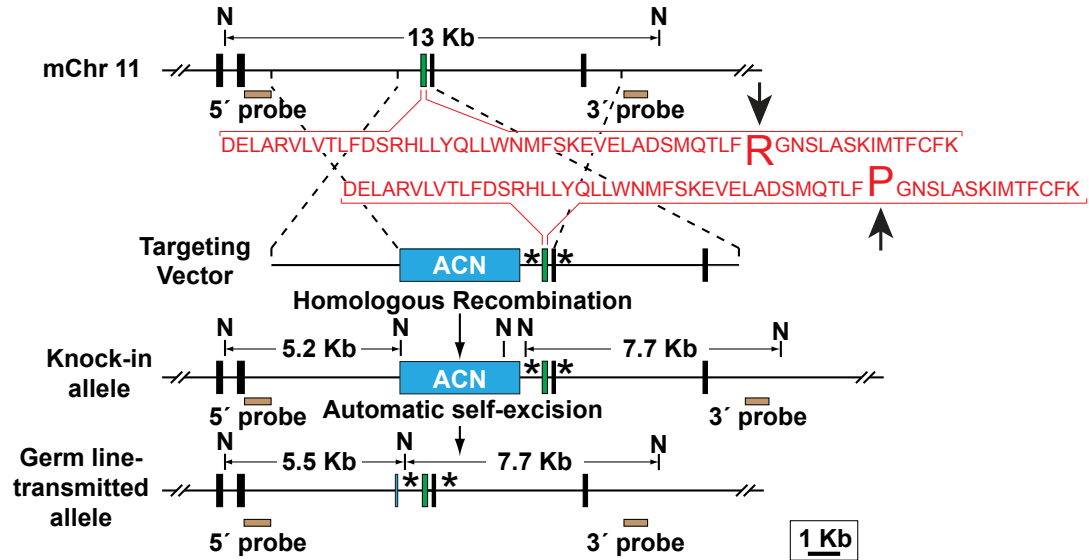

**B**

***Nf1*<sup>GRDCTL</sup> Targeting Strategy**

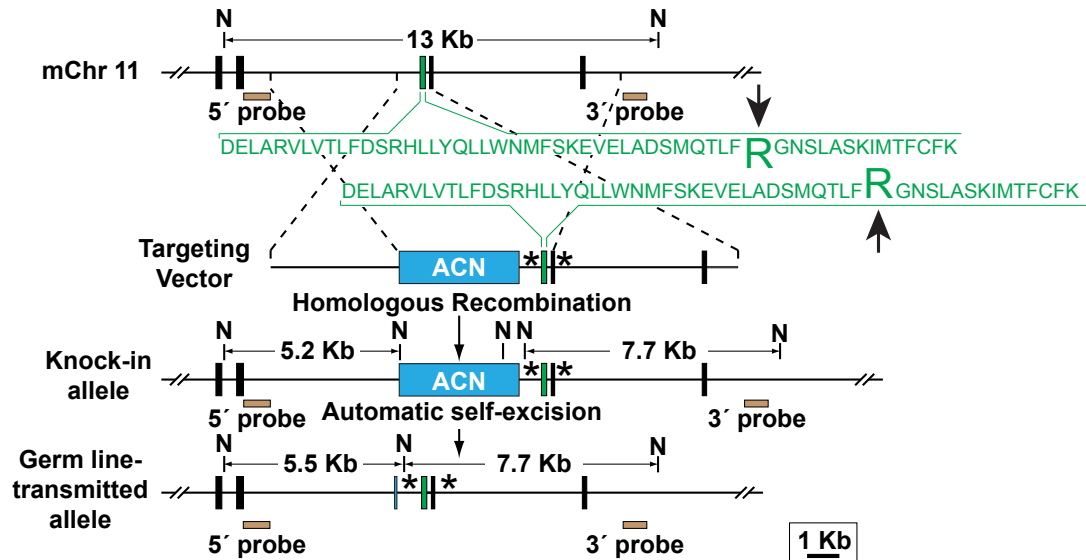

**C**

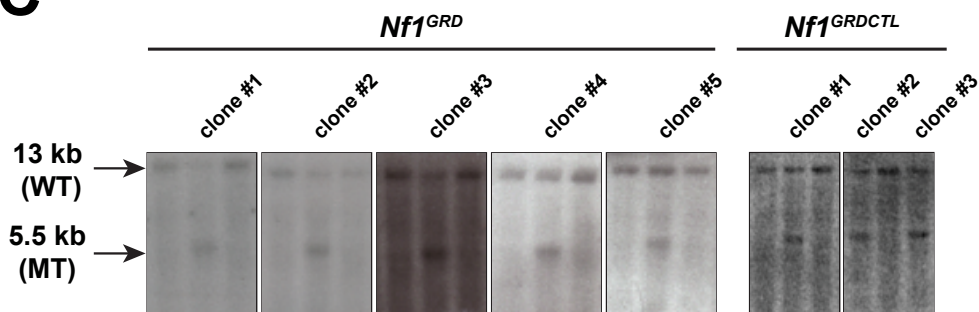

**D**

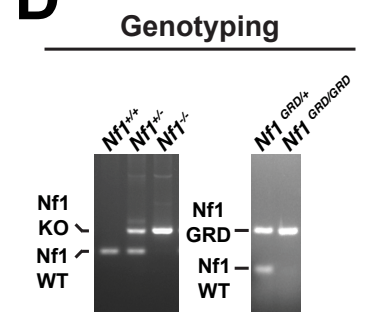

Supplement: supp [file elife-07780-supp-v1.zip]
