# Supplementary figures and images for: Loss of neurofibromin Ras-GAP activity enhances the formation of cardiac blood islands in murine embryos
Source: eLife journal article supplement (doi:10.7554/elife.07780), 2015-10-13

Figure 4-figure supplement 2

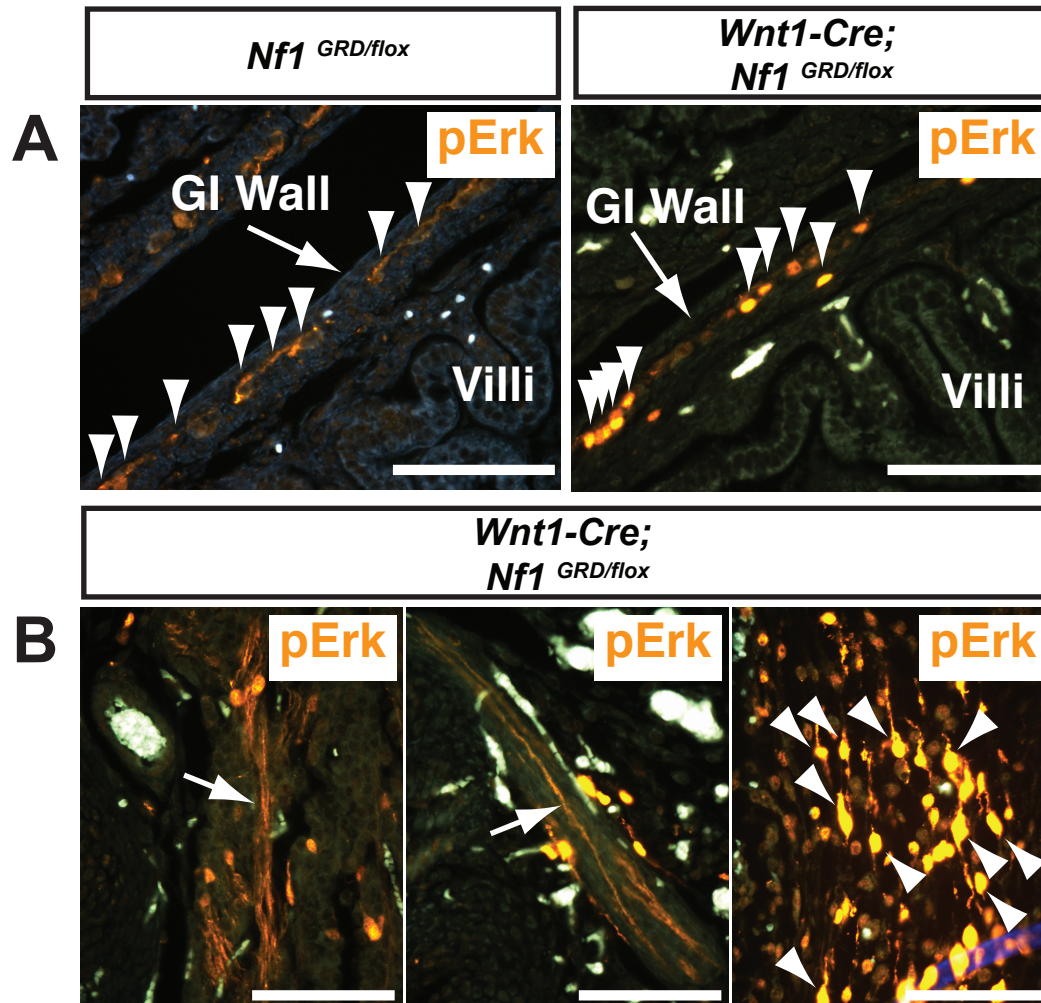

Supplement: supp [file elife-07780-supp-v1.zip]
